# Supplementary material for: A high output power density triboelectric nanogenerator based on surface-patterned PI/UIO-66-NH 2 mixed matrix membranes
Source: Royal Society of Chemistry journal article supplement (doi:10.1039/d5nr03339j), 2025-01-01
Supplement: d5nr03339j1.pdf [file d5nr03339j1.pdf]

## Electronic Supplementary Information

*Nanoscale*

### **Triboelectric Nanogenerator Based on Surface-Patterned PI/UIO-66-NH<sub>2</sub> Mixed Matrix Membranes**

Jin Wang,<sup>\*a</sup> Tianlong Zhou,<sup>a</sup> Jie Zou,<sup>a</sup> Jianhang Hai,<sup>a</sup> Yunqing Lu,<sup>b</sup>

<sup>a</sup> *School of Telecommunication and Information Engineering, Nanjing University of Posts and Telecommunications, Nanjing 210003, China*

<sup>b</sup> *College of Electronic and Optical Engineering & College of Flexible Electronics (Future Technology), Nanjing University of Posts & Telecommunications, Nanjing 210023, China*

\*Corresponding authors.

E-mail: jinwang@njupt.edu.cn.

## Supplementary Figures

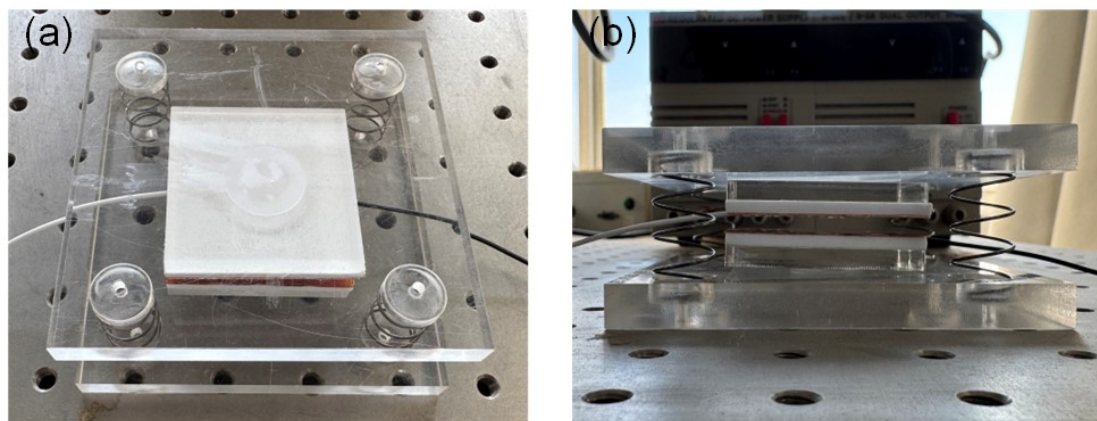

Figure S1. (a) Top-view and (b) side-view pictures of the fabricated TENG.

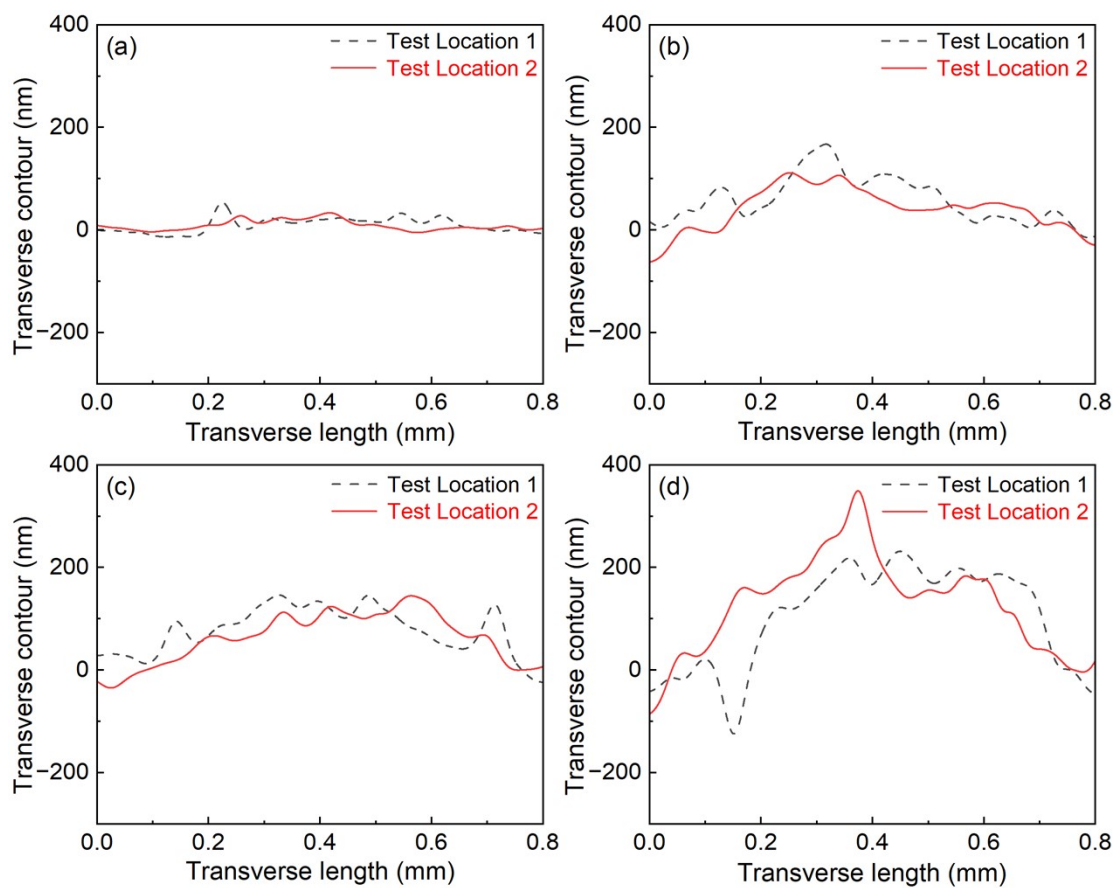

Figure S2. Lateral profiles of (a) PI, (b) MMM-1, (c) MMM-3, (d) MMM-5.

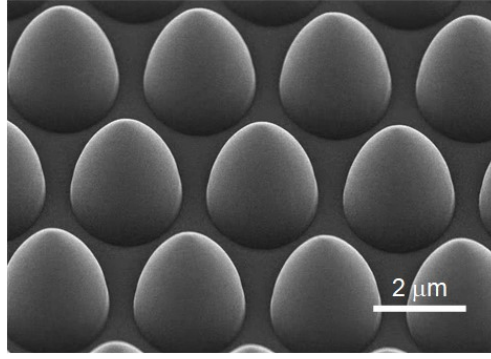

Figure S3. Surface SEM image of sapphire substrate.

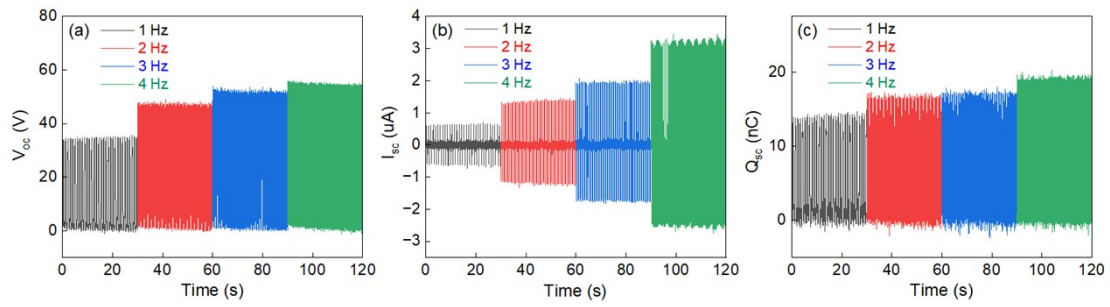

Figure S4. (a) Open-circuit voltage ( $V_{oc}$ ), (b) short-circuit current ( $I_{sc}$ ), and (c) short-circuit transferred charge ( $Q_{sc}$ ) of surface patterned TENG-5 across 1~4 Hz operation frequencies.

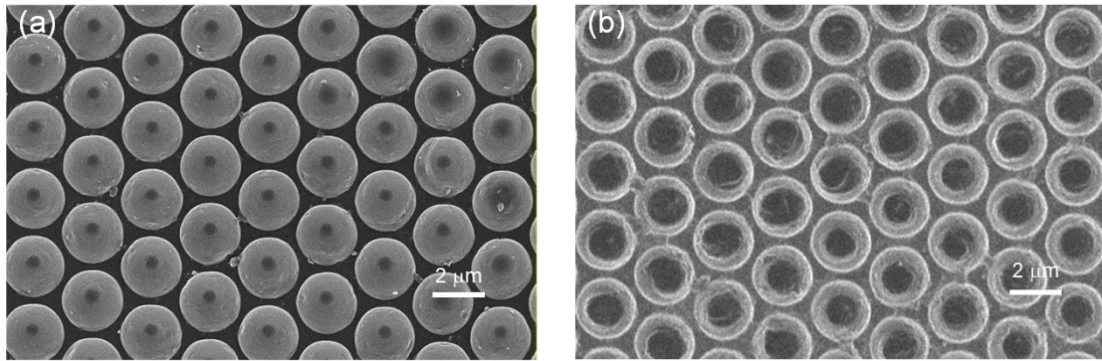

Figure S5. Surface SEM images of patterned MMM-5 (a) before and (b) after 20,000 continuous operation cycles at 2 Hz.
